# Supplementary material for: Oxygen-assisted monodisperse transition-metal-atom-induced graphite phase transformation to diamond: a first-principles calculation study
Source: Royal Society of Chemistry journal article supplement (doi:10.1039/d4ta04153d), 2024-01-01
Supplement: d4ta04153d1.pdf [file d4ta04153d1.pdf]

## Supplemental Information

### Oxygen-assisted monodisperse transition-metal atoms induced graphite phase transformation to diamond: A First-Principles Calculation

Shaohua Lu,<sup>abcdef</sup> Xiongtao Zhang,<sup>abcdef</sup> Chengke Chen,<sup>abcdef</sup> Meiyang Jiang,<sup>abcdef</sup> Xiao  
Li,<sup>abcdef</sup> Xiaojun Hu<sup>abcdef\*</sup>

<sup>a</sup> College of Materials Science and Engineering, Zhejiang University of Technology,  
Hangzhou 310014, China

<sup>b</sup> Institute of Wen Zhou, Zhejiang University, Wenzhou 325006, China

<sup>c</sup> Moganshan Diamond Research Center, De Qing, Hu Zhou, 313200, China

<sup>d</sup> Diamond Joint Research Center for Zhejiang University of Technology and Tanghe  
Scientific & Technology Company, De Qing, Hu Zhou, 313200, China

<sup>e</sup> Moganshan Institute ZJUT, Kangqian District, Deqing 313200, China

<sup>f</sup> Wenzhou Key Laboratory of Novel Optoelectronic and Nano Materials, Wenzhou  
325006, China

E-mail addresses: [huxj@zjut.edu.cn](mailto:huxj@zjut.edu.cn);

**Table S1. The bond lengths and bond angles information for Bulk diamond, Graphene, and diamane.**

| Systems      | $d_1(\text{C-C})/\text{\AA}$ | $d_2(\text{C-C})/\text{\AA}$ | $d_3(\text{C-C})/\text{\AA}$ | $\alpha/^\circ$ | $\beta/^\circ$ | $\gamma/^\circ$ |
|--------------|------------------------------|------------------------------|------------------------------|-----------------|----------------|-----------------|
| Bulk diamond | 1.540                        | 1.540                        | 1.540                        | 109.5           | 109.5          | 109.5           |
| Graphene     | 1.420                        | /                            | 1.420                        | 120.0           | 120.0          | 120.0           |
| No-metal     | 1.479                        | 1.704                        | 1.704                        | 117.0           | 100.1          | 111.3           |
| Ti           | 1.529                        | 1.654                        | 1.513                        | 112.3           | 106.0          | 112.0           |
| Zr           | 1.518                        | 1.665                        | 1.526                        | 111.5           | 107.0          | 111.6           |
| Hf           | 1.519                        | 1.669                        | 1.525                        | 110.8           | 107.6          | 111.5           |
| Ta           | 1.535                        | 1.635                        | 1.529                        | 109.5           | 109.4          | 111.3           |
| Mo           | 1.530                        | 1.619                        | 1.525                        | 110.8           | 109.9          | 111.1           |
| W            | 1.555                        | 1.609                        | 1.528                        | 109.4           | 109.4          | 111.0           |
| Re           | 1.547                        | 1.605                        | 1.528                        | 109.9           | 109.2          | 111.1           |
| Os           | 1.540                        | 1.611                        | 1.526                        | 110.2           | 110.6          | 111.3           |
| Ir           | 1.537                        | 1.609                        | 1.531                        | 110.3           | 111.2          | 111.3           |
| Ni           | 1.519                        | 1.621                        | 1.523                        | 106.5           | 109.7          | 113.5           |
| Pd           | 1.527                        | 1.618                        | 1.524                        | 111.3           | 110.4          | 113.6           |
| Pt           | 1.535                        | 1.601                        | 1.524                        | 110.7           | 111.4          | 111.3           |

**Table S2 Adsorption energy of TM atoms adsorbed on the O-terminated diamond surface**

| TM atoms | Stable adsorption site | Adsorption energy / eV |
|----------|------------------------|------------------------|
| Ti       | FCC                    | -13.15                 |
|          | HCP                    | -12.96                 |
| Zr       | FCC                    | -14.54                 |
|          | HCP                    | -14.38                 |
| Hf       | FCC                    | -14.76                 |
|          | HCP                    | -14.59                 |
| Ta       | Bridge                 | -13.59                 |
|          | FCC                    | -13.76                 |
|          | HCP                    | -13.52                 |
| Mo       | Bridge                 | -9.55                  |
|          | FCC                    | -9.68                  |
|          | HCP                    | -9.47                  |
| W        | Bridge                 | -11.13                 |
|          | FCC                    | -10.89                 |
|          | HCP                    | -10.66                 |
| Re       | Bridge                 | -8.97                  |
|          | FCC                    | -8.63                  |
|          | HCP                    | -8.47                  |
| Os       | Bridge                 | -8.02                  |
|          | FCC                    | -8.10                  |
|          | HCP                    | -8.03                  |
| Ir       | FCC                    | -7.22                  |
|          | HCP                    | -7.18                  |
| Ni       | FCC                    | -7.24                  |
|          | HCP                    | -7.17                  |
| Pd       | FCC                    | -4.55                  |
|          | HCP                    | -4.51                  |
| Pt       | FCC                    | -5.43                  |
|          | HCP                    | -5.34                  |

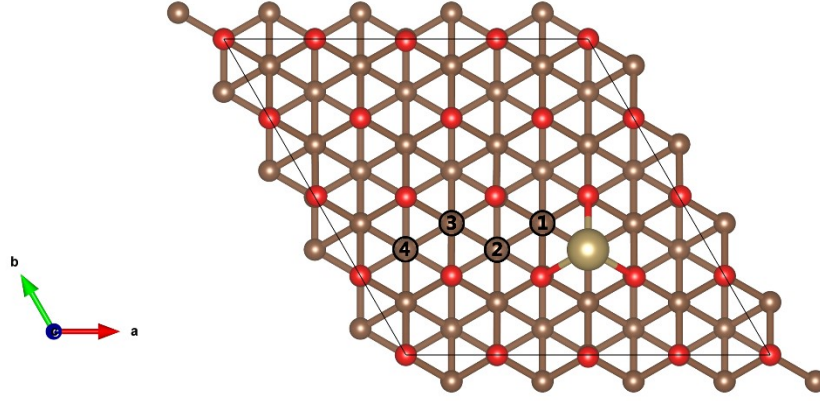

**Fig. S1 The adsorption sites for the second Ta atom on the O-terminated diamond (111) substrate**

Considering that TM atoms approach the surface along the vertical direction, using Ta as an example, we calculated the stable adsorption model for the adsorption of a second Ta atom on the O-terminated diamond (111) substrate where one Ta atom has already been adsorbed. The adsorption energy was calculated as

$$E_{ads} = \frac{(E_{surf+nTM} - E_{surf} - nE_{TM})}{n}$$

where  $E_{surf+nTM}$  is the total energy of the adsorption model,  $E_{surf}$  is the energy of O-terminated diamond (111) substrate,  $E_{TM}$  is the energy of a single TM atom, and  $n$  is number of adsorbed TM atom.

As shown in **Fig. S1**, there are four adsorption sites for the second Ta atom on the O-terminated diamond (111) substrate. We placed the second Ta atom above these adsorption sites for structure optimization to obtain stable adsorption structures. There are three stable adsorption structures. The  $E_{ads}$  at position 2 is -11.92 eV, the  $E_{ads}$  at position 3 is -12.62 eV, and the  $E_{ads}$  at position 4 is the most negative (-12.83 eV). This suggests that the second TM atom is more stable at position 4 and the falling TM atoms will be adsorbed farther away from the adsorbed TM atom when TM atoms are vertically close to O-terminated diamond (111) substrate. Thus, the O-terminated diamond (111) substrate is more effective in suppressing the aggregation of TM atoms more effectively.

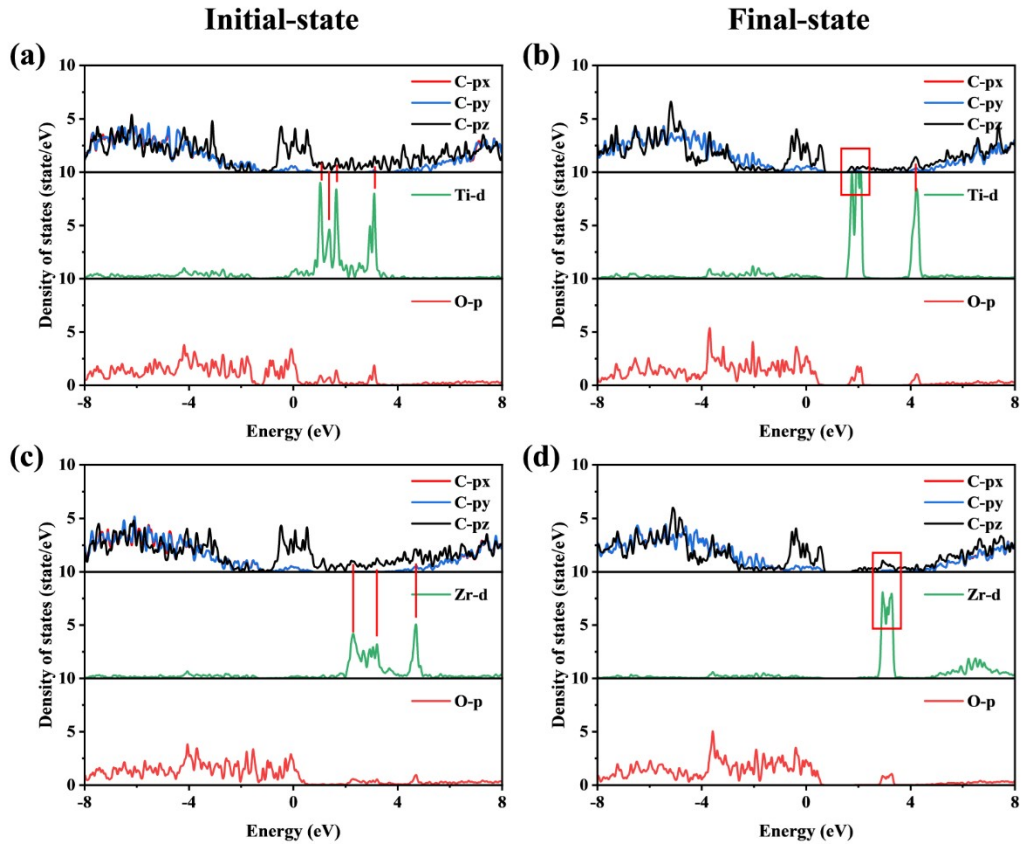

**Fig. S2.** The partial density of states (PDOS) for initial-state and final-state structures of other Type I systems with the outer valence electron state of  $d^2s^2$  for Ti (a, b) and Zr (c, d). C represents the carbon atoms of bottom graphene. (The short vertical red line indicates the position of the overlapping peaks, and the Fermi level position is set to 0 eV)

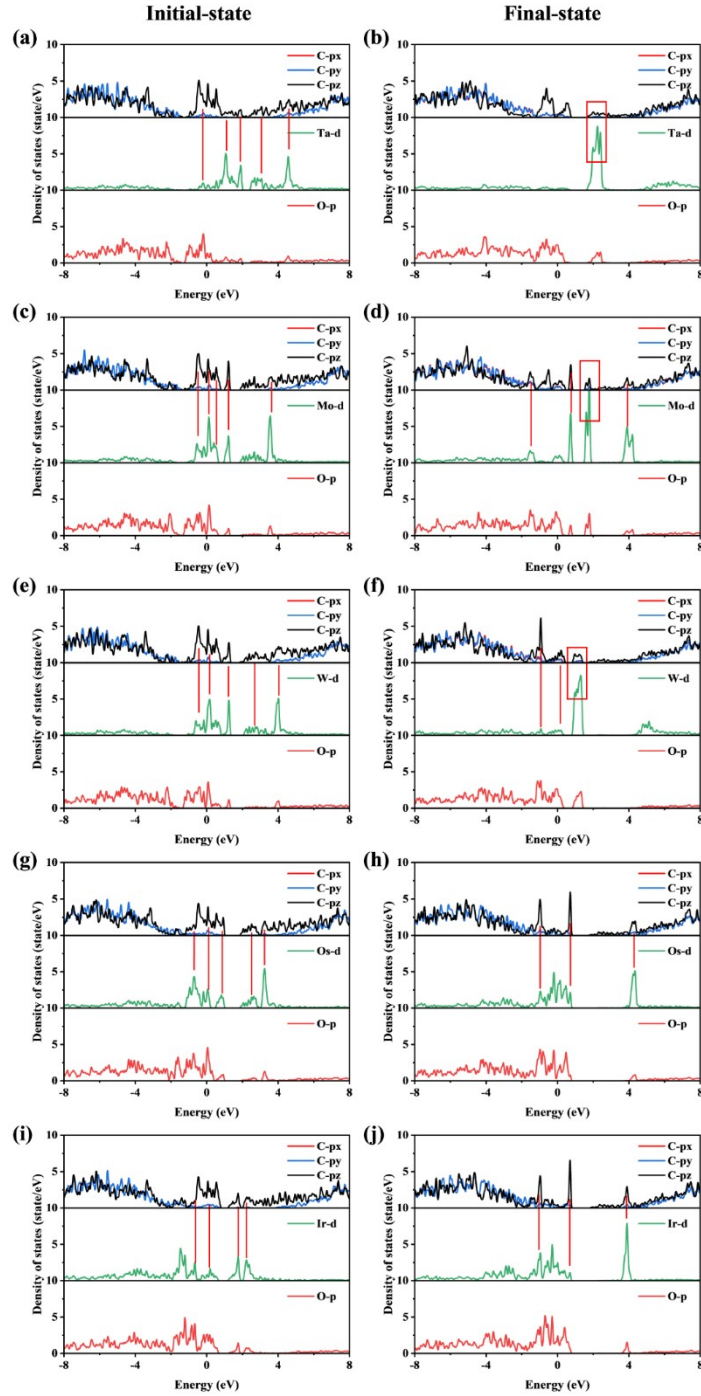

**Fig. S3.** The partial density of states (PDOS) for initial-state and final-state structures of other Type II systems with the outer valence electron state of  $d^3s^2-d^7s^2$  for Ta (a, b), Mo (c, d), W (e, f), Os (g, h), and Ir (i, j). C represents the carbon atoms of bottom graphene. (The short vertical red line indicates the position of the overlapping peaks, and the Fermi level position is set to 0 eV)

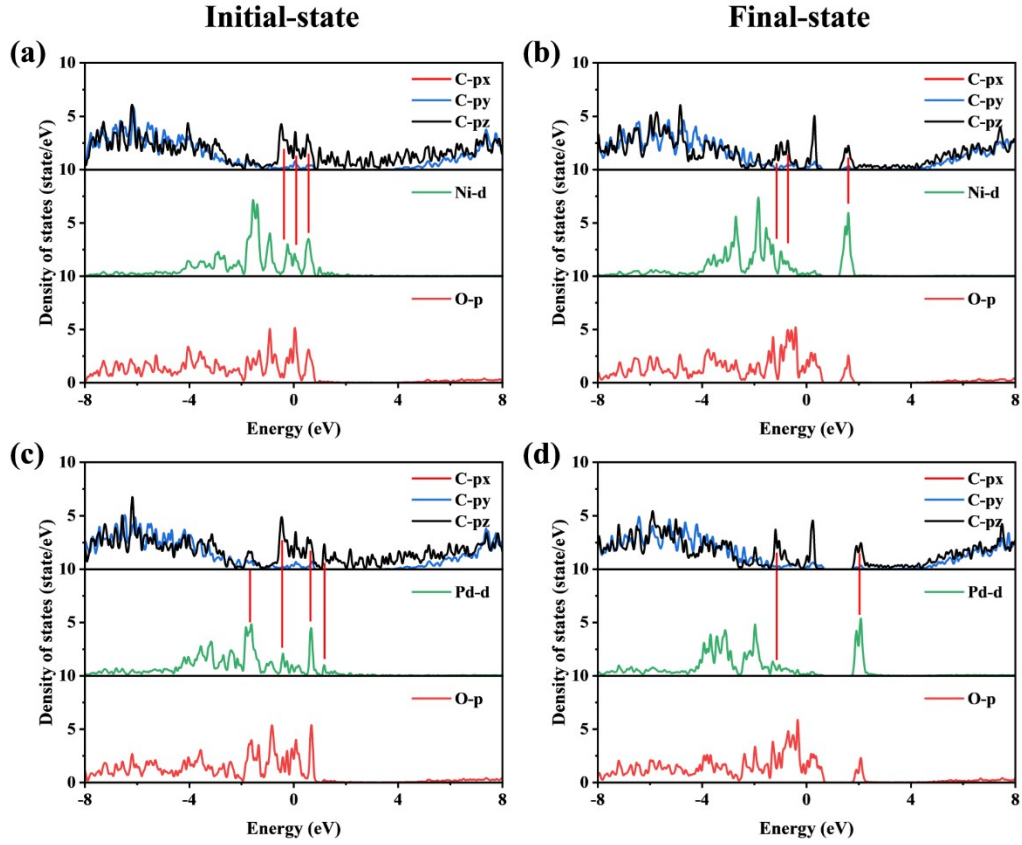

**Fig. S4.** The partial density of states (PDOS) for initial-state and final-state structures of other Type III systems with the outer valence electron state of  $d^9s^1$  for Ni (a, b) and Pd (c, d). C represents the carbon atoms of bottom graphene. (The short vertical red line indicates the position of the overlapping peaks, and the Fermi level position is set to 0 eV)

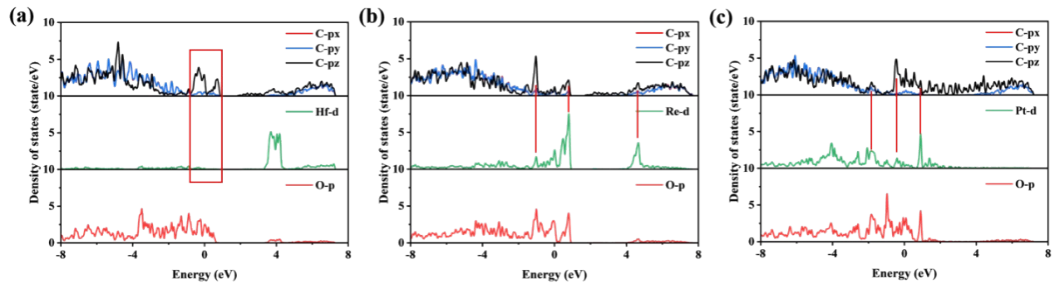

**Fig. S5.** The partial density of state (PDOS) of final-state structures for Hf, Re, and Pt systems calculated using the DFT+U theory ( $U_{\text{Hf}} = 2.71$ ,  $U_{\text{Re}} = 2.32$ , and  $U_{\text{Pt}} = 2.42$ ). C represents the carbon atoms of bottom graphene. The Fermi level position is set to 0 eV.



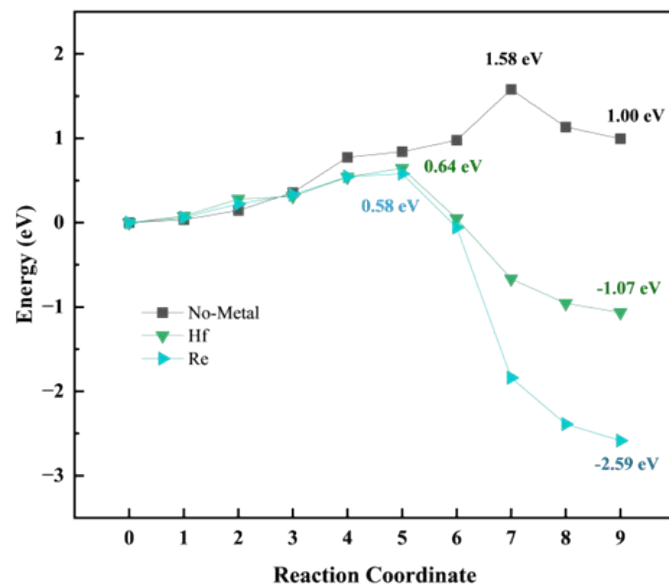

**Fig. S6 Energy changes of phase transformation from 3-layer graphene to diamond in the No-Metal, Hf, and Re systems.**

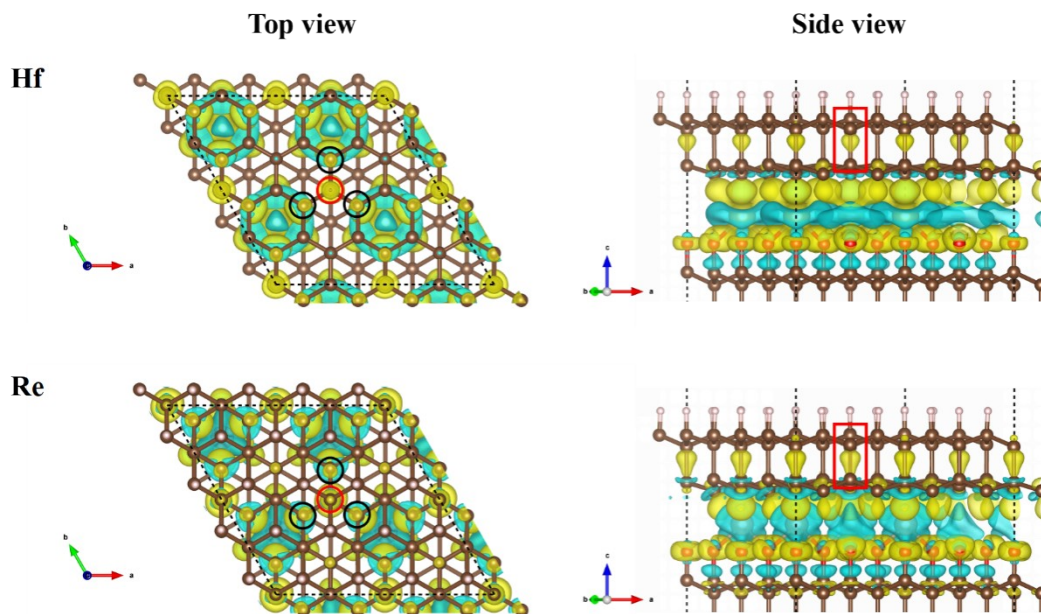

**Fig. S7** Differential charge density of final-state structures for Hf and Re systems calculated using 4×4 supercells including four TM atoms (The lateral dimensions of approximately is 10.08 Å and TM coverage is 25%). The isosurface level is set to 0.006 e/ Bohr<sup>3</sup>.

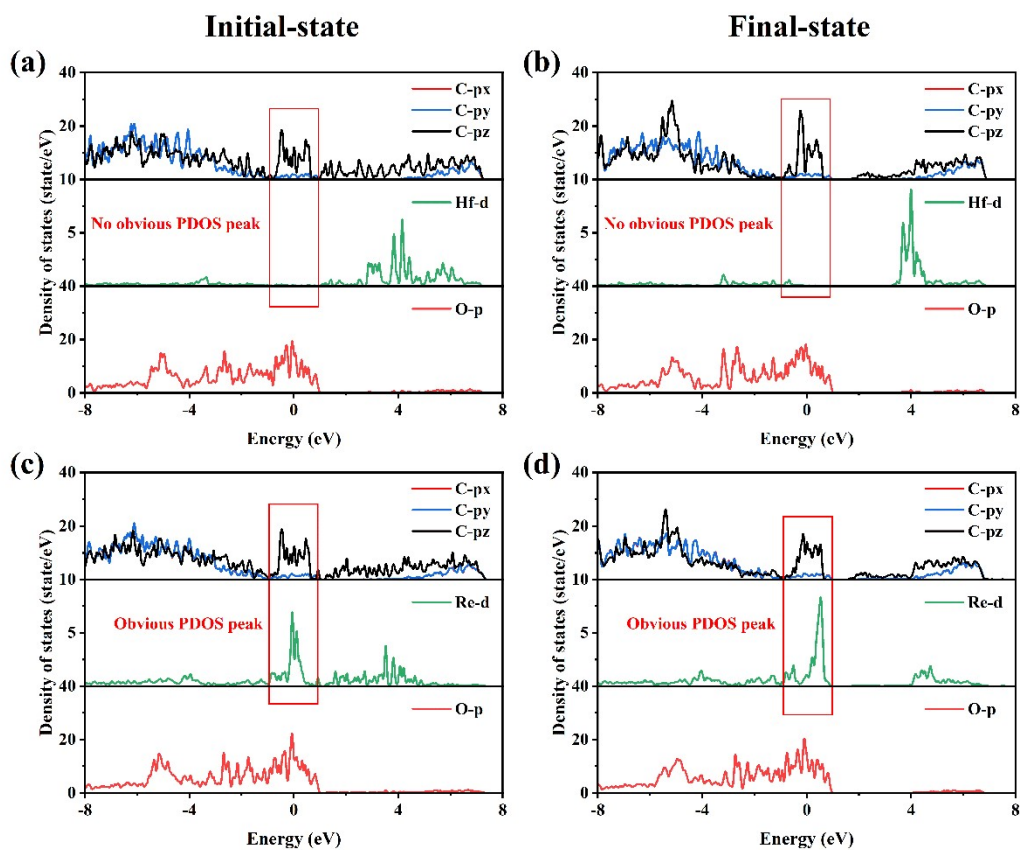

**Fig. S8** Partial density of state (PDOS) of initial- and final-state structures for Hf (a, b) and Re (c, d) systems calculated using  $4\times 4$  supercells including one TM atom (The lateral dimensions of approximately is  $10.08 \text{ \AA}$  and TM coverage is 6.25%). C represents the carbon atoms of bottom graphene. The Fermi level position is set to 0 eV.

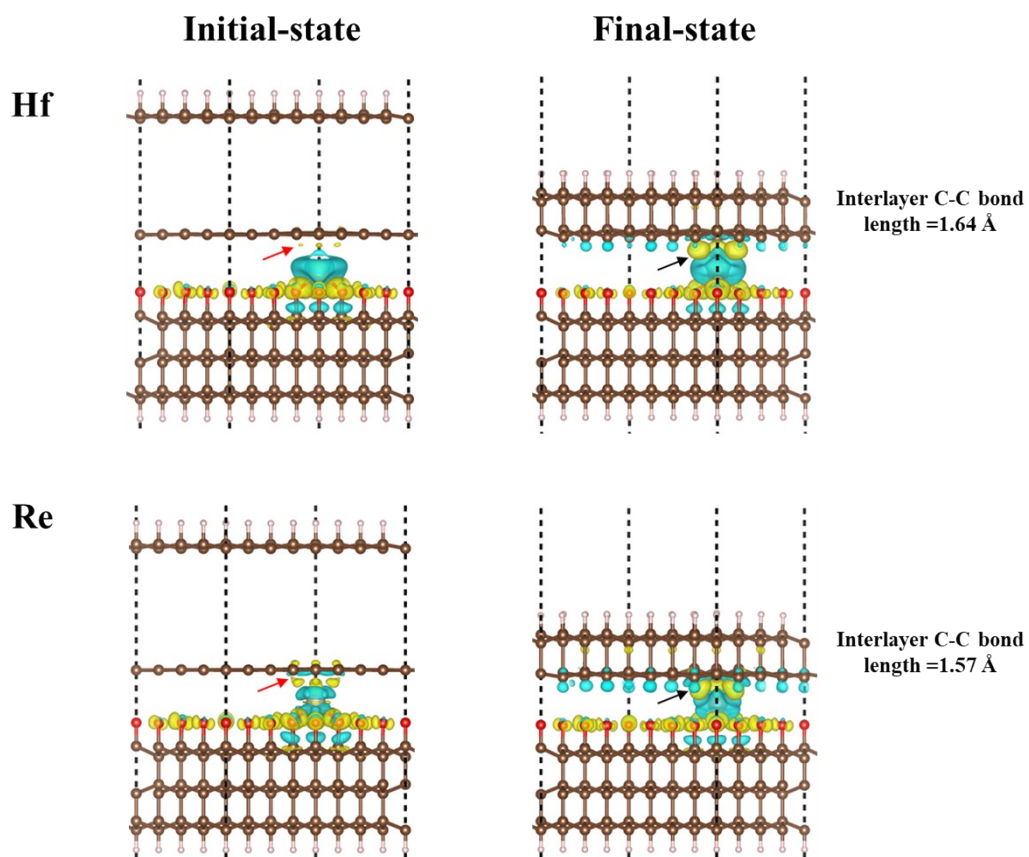

**Fig. S9** Differential charge density of initial- and final-state structures for Hf and Re systems calculated using  $4 \times 4$  supercells including one TM atom (The lateral dimensions of approximately is 10.08 Å and TM coverage is 6.25%). The isosurface level is set to  $0.006 \text{ e} / \text{Bohr}^3$ .
